# Supplementary material
Source: ML conference proceedings conference paper supplement (https://openreview.net/forum?id=6f320HfMeS)
Supplement: supplementary_material [file attachment]

## Contents

|                                                                   |           |
|-------------------------------------------------------------------|-----------|
| <b>A Proofs</b>                                                   | <b>13</b> |
| A.1 Proof of Lemma 3.1                                            | 13        |
| A.2 Proof of Theorem 3.2                                          | 14        |
| A.3 Proofs for examples in Section 3.3                            | 16        |
| A.3.1 Proof for Example 3.3.1                                     | 16        |
| A.3.2 Proof of Example 3.3.2                                      | 16        |
| A.3.3 Proof of Lemma A.1                                          | 17        |
| <b>B Additional numerical experiments</b>                         | <b>17</b> |
| B.1 Illustration of confidence intervals and normalized scores    | 18        |
| B.2 Additional results for homogeneous missingness                | 18        |
| B.3 Estimation error for one-bit matrix estimation                | 19        |
| B.4 Additional results for heterogeneous missingness              | 19        |
| B.5 Additional plots for the sales dataset                        | 19        |
| <b>C Additional details of algorithms and extensions</b>          | <b>20</b> |
| C.1 Extension to likelihood-based scores and categorical matrices | 20        |
| C.2 Full conformalized matrix completion                          | 21        |
| C.3 Exact split conformalized matrix completion                   | 22        |

## A Proofs

The section collects the proofs for the technical results in the main text. Section A.1 and A.2 are devoted to the proof of Lemma 3.1 and Theorem 3.2 respectively. In the end, Section A.3 provides proofs for the coverage gap bounds in the two examples in Section 3.3.

### A.1 Proof of Lemma 3.1

Fix a set of locations  $\mathcal{B} := \{(i_1, j_1), \dots, (i_{n_{\text{cal}}+1}, j_{n_{\text{cal}}+1})\}$ , and an index  $1 \leq m \leq n_{\text{cal}} + 1$ . By the definition of conditional probability, we have

$$\begin{aligned}
 & \mathbb{P}((i_*, j_*) = (i_m, j_m) \mid \mathcal{S}_{\text{cal}} \cup \{(i_*, j_*)\} = \mathcal{B}, \mathcal{S}_{\text{tr}} = \mathcal{S}_0) \\
 &= \frac{\mathbb{P}((i_*, j_*) = (i_m, j_m), \mathcal{S}_{\text{cal}} = \mathcal{B} \setminus \{(i_m, j_m)\} \mid \mathcal{S}_{\text{tr}} = \mathcal{S}_0, |\mathcal{S}| = n)}{\mathbb{P}(\mathcal{S}_{\text{cal}} \cup \{(i_*, j_*)\} = \mathcal{B} \mid \mathcal{S}_{\text{tr}} = \mathcal{S}_0, |\mathcal{S}| = n)} \\
 &= \frac{\mathbb{P}((i_*, j_*) = (i_m, j_m), \mathcal{S}_{\text{cal}} = \mathcal{B} \setminus \{(i_m, j_m)\} \mid \mathcal{S}_{\text{tr}} = \mathcal{S}_0, |\mathcal{S}| = n)}{\sum_{l=1}^{n_{\text{cal}}+1} \mathbb{P}((i_*, j_*) = (i_l, j_l), \mathcal{S}_{\text{cal}} = \mathcal{B} \setminus \{(i_l, j_l)\} \mid \mathcal{S}_{\text{tr}} = \mathcal{S}_0, |\mathcal{S}| = n)}.
 \end{aligned}$$

It then boils down to computing  $\mathbb{P}(\mathcal{S}_{\text{cal}} = \mathcal{S}_1, (i_*, j_*) = (i_l, j_l) \mid \mathcal{S}_{\text{tr}} = \mathcal{S}_0, |\mathcal{S}| = n)$  for any fixed set  $\mathcal{S}_1$  and fixed location  $(i_l, j_l) \notin \mathcal{S}_0 \cup \mathcal{S}_1$ . To this end, we have the following claim (we defer its proof to the end of this section)

$$\begin{aligned}
 & \mathbb{P}(\mathcal{S}_{\text{cal}} = \mathcal{S}_1, (i_*, j_*) = (i_l, j_l) \mid \mathcal{S}_{\text{tr}} = \mathcal{S}_0, |\mathcal{S}| = n) \\
 &= \frac{1}{d_1 d_2 - n} \cdot \frac{\prod_{(i,j) \in \mathcal{S}_1} \frac{p_{ij}}{1-p_{ij}}}{\sum_{\mathcal{A} \in \Omega_{\mathcal{S}_{\text{tr}}, n}} \prod_{(i', j') \in \mathcal{A}} \frac{p_{i'j'}}{1-p_{i'j'}}}, \tag{8}
 \end{aligned}$$

462 where  $\Omega_{\mathcal{S}_{\text{tr}},n} = \{\mathcal{A} \subseteq [d_1] \times [d_2] : |\mathcal{A}| = n - |\mathcal{S}_{\text{tr}}|, \mathcal{A} \cap \mathcal{S}_{\text{tr}} = \emptyset\}$ . As a result, we obtain

$$\begin{aligned}
& \mathbb{P}((i_*, j_*) = (i_m, j_m) \mid \mathcal{S}_{\text{cal}} \cup \{(i_*, j_*)\} = \mathcal{B}, \mathcal{S}_{\text{tr}} = \mathcal{S}_0, |\mathcal{S}| = n) \\
&= \frac{\prod_{(i,j) \in \mathcal{B} \setminus \{(i_m, j_m)\}} \frac{p_{ij}}{1-p_{ij}}}{\sum_{l=1}^{n_{\text{cal}}+1} \prod_{(i,j) \in \mathcal{B} \setminus \{(i_l, j_l)\}} \frac{p_{ij}}{1-p_{ij}}} \\
&= \frac{h_{i_m, j_m}}{\sum_{l=1}^{n_{\text{cal}}+1} h_{i_l, j_l}}, \tag{9}
\end{aligned}$$

463 where  $h_{ij} = (1 - p_{ij})/p_{ij}$ . This finishes the proof.

464 **Proof of Equation (8).** Fix any two disjoint subsets  $\mathcal{S}_0, \mathcal{S}_1 \subseteq [d_1] \times [d_2]$  with  $|\mathcal{S}_0| + |\mathcal{S}_1| = n$ . We  
465 have

$$\begin{aligned}
& \mathbb{P}(\mathcal{S}_{\text{cal}} = \mathcal{S}_1, \mathcal{S}_{\text{tr}} = \mathcal{S}_0 \mid |\mathcal{S}| = n) \\
&= \mathbb{P}(\text{supp}(\mathbf{Z}) = \mathcal{S}_0 \cup \mathcal{S}_1, \mathcal{S}_0 \subseteq \text{supp}(\mathbf{W}), \mathcal{S}_1 \subseteq \text{supp}(\mathbf{W})^c \mid |\mathcal{S}| = n).
\end{aligned}$$

466 Since  $\mathbf{W}$  and  $\mathbf{Z}$  are independent, one further has

$$\begin{aligned}
& \mathbb{P}(\text{supp}(\mathbf{Z}) = \mathcal{S}_0 \cup \mathcal{S}_1, \mathcal{S}_0 \subseteq \text{supp}(\mathbf{W}), \mathcal{S}_1 \subseteq \text{supp}(\mathbf{W})^c \mid |\mathcal{S}| = n) \\
&= \mathbb{P}(\mathcal{S}_0 \subseteq \text{supp}(\mathbf{W}), \mathcal{S}_1 \subseteq \text{supp}(\mathbf{W})^c) \cdot \mathbb{P}(\text{supp}(\mathbf{Z}) = \mathcal{S}_0 \cup \mathcal{S}_1 \mid |\mathcal{S}| = n) \\
&= q^{|\mathcal{S}_0|} (1-q)^{|\mathcal{S}_1|} \cdot \mathbb{P}(\text{supp}(\mathbf{Z}) = \mathcal{S}_0 \cup \mathcal{S}_1 \mid |\mathcal{S}| = n) \\
&= \frac{q^{|\mathcal{S}_0|} (1-q)^{|\mathcal{S}_1|}}{\mathbb{P}(|\mathcal{S}| = n)} \prod_{(i', j') \in [d_1] \times [d_2]} (1 - p_{i' j'}) \prod_{(i, j) \in \mathcal{S}_0 \cup \mathcal{S}_1} \frac{p_{ij}}{1 - p_{ij}}, \tag{10}
\end{aligned}$$

467 where the last two identities are based on direct computations.

468 Based on (10), one can further compute

$$\begin{aligned}
& \mathbb{P}(\mathcal{S}_{\text{tr}} = \mathcal{S}_0 \mid |\mathcal{S}| = n) \\
&= \sum_{\mathcal{A} \in \Omega_{\mathcal{S}_{\text{tr}},n}} \mathbb{P}(\mathcal{S}_{\text{cal}} = \mathcal{A}, \mathcal{S}_{\text{tr}} = \mathcal{S}_0 \mid |\mathcal{S}| = n) \\
&= \frac{q^{|\mathcal{S}_0|} (1-q)^{n-|\mathcal{S}_0|}}{\mathbb{P}(|\mathcal{S}| = n)} \sum_{\mathcal{A} \in \Omega_{\mathcal{S}_{\text{tr}},n}} \prod_{(i', j') \in [d_1] \times [d_2]} (1 - p_{i' j'}) \prod_{(i, j) \in \mathcal{S}_0 \cup \mathcal{A}} \frac{p_{ij}}{1 - p_{ij}}, \tag{11}
\end{aligned}$$

469 where the last identity uses Equation (10).

470 Now we are ready to prove (8). Recall that the new data point  $(i_*, j_*) \mid \mathcal{S}$  is drawn uniformly from  
471  $\text{Unif}(\mathcal{S}^c)$ . Therefore one has

$$\begin{aligned}
& \mathbb{P}(\mathcal{S}_{\text{cal}} = \mathcal{S}_1, (i_*, j_*) = (i_{n+1}, j_{n+1}) \mid \mathcal{S}_{\text{tr}} = \mathcal{S}_0, |\mathcal{S}| = n) \\
&= \frac{\mathbb{P}(\mathcal{S}_{\text{cal}} = \mathcal{S}_1, \mathcal{S}_{\text{tr}} = \mathcal{S}_0, (i_*, j_*) = (i_{n+1}, j_{n+1}) \mid |\mathcal{S}| = n)}{\mathbb{P}(\mathcal{S}_{\text{tr}} = \mathcal{S}_0 \mid |\mathcal{S}| = n)} \\
&= \frac{\mathbb{P}((i_*, j_*) = (i_{n+1}, j_{n+1}) \mid \mathcal{S} = \mathcal{S}_1 \cup \mathcal{S}_0) \mathbb{P}(\mathcal{S}_{\text{cal}} = \mathcal{S}_1, \mathcal{S}_{\text{tr}} = \mathcal{S}_0 \mid |\mathcal{S}| = n)}{\mathbb{P}(\mathcal{S}_{\text{tr}} = \mathcal{S}_0 \mid |\mathcal{S}| = n)} \\
&= \frac{1}{d_1 d_2 - n} \cdot \frac{\prod_{(i,j) \in \mathcal{S}_1} \frac{p_{ij}}{1-p_{ij}}}{\sum_{\mathcal{A} \in \Omega_{\mathcal{S}_{\text{tr}},n}} \prod_{(i', j') \in \mathcal{A}} \frac{p_{i' j'}}{1-p_{i' j'}}}, \tag{12}
\end{aligned}$$

472 where the last line follows from (10) and (11).

## 473 A.2 Proof of Theorem 3.2

474 First, fix any  $a \in [0, 1]$ . Lemma 3.1 together with the weighted conformal prediction framework of  
475 Tibshirani et al. (2019), implies that

$$\mathbb{P}\left(M_{i_* j_*} \in \widehat{M}_{i_* j_*} \pm q_{i_* j_*}^*(a) \cdot \widehat{s}_{i_* j_*} \mid \mathcal{S}_{\text{tr}}, \mathcal{S}_{\text{cal}} \cup \{(i_*, j_*)\}\right) \geq 1 - a,$$

476 where

$$q_{i_*j_*}^*(a) = \text{Quantile}_{1-a} \left( \sum_{(i,j) \in \mathcal{S}_{\text{cal}} \cup \{(i_*, j_*)\}} w_{ij} \cdot \delta_{R_{ij}} \right),$$

477 and

$$w_{ij} = \frac{h_{ij}}{\sum_{(i',j') \in \mathcal{S}_{\text{cal}} \cup \{(i_*, j_*)\}} h_{i'j'}}.$$

478 Indeed, here  $a$  can be any function of the random variables we are conditioning on—that is,  $a$  may  
479 depend on  $n$ , on  $\mathcal{S}_{\text{tr}}$ , and on  $\mathcal{S}_{\text{cal}} \cup \{(i_*, j_*)\}$ .

480 Next define  $a = \alpha + \Delta$  where  $\Delta$  is defined as in (6). We observe that, since each  $\hat{h}_{ij}$  is a function of  
481  $\mathcal{S}_{\text{tr}}$ , then  $\Delta$  (and thus also  $a$ ) can therefore be expressed as a function of  $n$ ,  $\mathcal{S}_{\text{tr}}$ , and  $\mathcal{S}_{\text{cal}} \cup \{(i_*, j_*)\}$ .  
482 Therefore, applying the work above, we have

$$\mathbb{P} \left( M_{i_*j_*} \in \widehat{M}_{i_*j_*} \pm q_{i_*j_*}^*(\alpha + \Delta) \cdot \widehat{s}_{i_*j_*} \mid \mathcal{S}_{\text{tr}}, \mathcal{S}_{\text{cal}} \cup \{(i_*, j_*)\} \right) \geq 1 - \alpha - \Delta$$

483 and thus, after marginalizing,

$$\mathbb{P} \left( M_{i_*j_*} \in \widehat{M}_{i_*j_*} \pm q_{i_*j_*}^*(\alpha + \Delta) \cdot \widehat{s}_{i_*j_*} \right) \geq 1 - \alpha - \mathbb{E}[\Delta].$$

484 Next, we verify that

$$\widehat{q} \geq q_{i_*j_*}^*(\alpha + \Delta)$$

485 holds almost surely—if this is indeed the case, then we have shown that

$$\mathbb{P} \left( M_{i_*j_*} \in \widehat{M}_{i_*j_*} \pm \widehat{q} \cdot \widehat{s}_{i_*j_*} \right) \geq 1 - \alpha - \mathbb{E}[\Delta],$$

486 which establishes the desired result. Thus we only need to show that  $\widehat{q} \geq q_{i_*j_*}^*(\alpha + \Delta)$ , or equivalently,

$$\text{Quantile}_{1-\alpha} \left( \sum_{(i,j) \in \mathcal{S}_{\text{cal}}} \widehat{w}_{ij} \cdot \delta_{R_{ij}} + \widehat{w}_{\text{test}} \cdot \delta_{+\infty} \right) \geq \text{Quantile}_{1-\alpha-\Delta} \left( \sum_{(i,j) \in \mathcal{S}_{\text{cal}} \cup \{(i_*, j_*)\}} w_{ij} \cdot \delta_{R_{ij}} \right).$$

487 Define

$$w'_{ij} = \frac{\widehat{h}_{ij}}{\sum_{(i',j') \in \mathcal{S}_{\text{cal}} \cup \{(i_*, j_*)\}} \widehat{h}_{i'j'}} \quad (13)$$

488 for all  $(i, j) \in \mathcal{S} \cup \{(i_*, j_*)\}$ . Then by definition of  $\widehat{w}$ , we see that  $w'_{ij} \geq \widehat{w}_{ij}$  for  $(i, j) \in \mathcal{S}$ , and  
489 therefore,

$$\begin{aligned} & \text{Quantile}_{1-\alpha} \left( \sum_{(i,j) \in \mathcal{S}_{\text{cal}}} \widehat{w}_{ij} \cdot \delta_{R_{ij}} + \widehat{w}_{\text{test}} \cdot \delta_{+\infty} \right) \\ & \geq \text{Quantile}_{1-\alpha} \left( \sum_{(i,j) \in \mathcal{S}_{\text{cal}}} w'_{ij} \cdot \delta_{R_{ij}} + w'_{(i_*, j_*)} \cdot \delta_{+\infty} \right) \geq \text{Quantile}_{1-\alpha} \left( \sum_{(i,j) \in \mathcal{S}_{\text{cal}} \cup \{(i_*, j_*)\}} w'_{ij} \cdot \delta_{R_{ij}} \right) \end{aligned}$$

490 holds almost surely. Therefore it suffices to show that

$$\text{Quantile}_{1-\alpha} \left( \sum_{(i,j) \in \mathcal{S}_{\text{cal}} \cup \{(i_*, j_*)\}} w'_{ij} \cdot \delta_{R_{ij}} \right) \geq \text{Quantile}_{1-\alpha-\Delta} \left( \sum_{(i,j) \in \mathcal{S}_{\text{cal}} \cup \{(i_*, j_*)\}} w_{ij} \cdot \delta_{R_{ij}} \right)$$

491 holds almost surely. Indeed, we have

$$d_{\text{TV}} \left( \sum_{(i,j) \in \mathcal{S}_{\text{cal}} \cup \{(i_*, j_*)\}} w'_{ij} \cdot \delta_{R_{ij}}, \sum_{(i,j) \in \mathcal{S}_{\text{cal}} \cup \{(i_*, j_*)\}} w_{ij} \cdot \delta_{R_{ij}} \right) \leq \frac{1}{2} \sum_{(i,j) \in \mathcal{S}_{\text{cal}} \cup \{(i_*, j_*)\}} |w'_{ij} - w_{ij}| = \Delta,$$

492 where  $d_{\text{TV}}$  denotes the total variation distance. This completes the proof.

### 493 A.3 Proofs for examples in Section 3.3

494 Recall the definition of  $\Delta$ :

$$\Delta = \frac{1}{2} \sum_{(i,j) \in \mathcal{S}_{\text{cal}} \cup \{(i_*, j_*)\}} \left| \frac{\hat{h}_{ij}}{\sum_{(i',j') \in \mathcal{S}_{\text{cal}} \cup \{(i_*, j_*)\}} \hat{h}_{i'j'}} - \frac{h_{ij}}{\sum_{(i',j') \in \mathcal{S}_{\text{cal}} \cup \{(i_*, j_*)\}} h_{i'j'}} \right|.$$

495 Note that  $\Delta \leq 1$  by definition. We start with stating a useful lemma to bound the coverage gap  $\Delta$   
 496 using the estimation error of  $\hat{h}_{ij}$ .

497 **Lemma A.1.** *By the definition of the coverage gap  $\Delta$ , we have*

$$\Delta \leq \frac{\sum_{(i,j) \in \mathcal{S}_{\text{cal}} \cup \{(i_*, j_*)\}} |\hat{h}_{ij} - h_{ij}|}{\sum_{(i',j') \in \mathcal{S}_{\text{cal}}} \hat{h}_{i'j'}}. \quad (14)$$

#### 498 A.3.1 Proof for Example 3.3.1

499 Under the logistic model, one has for any  $(i, j)$

$$\mathbb{P}((i, j) \in \mathcal{S}_{\text{tr}}) = q \cdot p_{ij} = \frac{q \cdot \exp(u_i + v_j)}{1 + \exp(u_i + v_j)}.$$

500 In this case, if  $\hat{\mathbf{u}}$  and  $\hat{\mathbf{v}}$  are the constrained maximum likelihood estimators in Example 3.3.1  
 501 Theorem 6 in Chen et al. (2023) implies that

$$\|\hat{\mathbf{u}} - \mathbf{u}\|_{\infty} = O_{\mathbb{P}} \left( \sqrt{\frac{\log d_1}{d_2}} \right), \quad \|\hat{\mathbf{v}} - \mathbf{v}\|_{\infty} = O_{\mathbb{P}} \left( \sqrt{\frac{\log d_2}{d_1}} \right),$$

502 with the proviso that  $\|\mathbf{u}\|_{\infty} + \|\mathbf{v}\|_{\infty} \leq \tau < \infty$ ,  $d_2 \gg \sqrt{d_1} \log d_1$  and  $d_1 \gg (\log d_2)^2$ . Then for  
 503  $h_{ij} = \exp(-u_i - v_j)$  and  $\hat{h}_{ij} = \exp(-\hat{u}_i - \hat{v}_j)$ , we have

$$\max_{i,j} |\hat{h}_{ij} - h_{ij}| = \max_{i,j} e^{-u_i - v_j} \left( e^{-(\hat{u}_i - u_i) - (\hat{v}_j - v_j)} - 1 \right) = O_{\mathbb{P}} \left( \sqrt{\frac{\log d_1}{d_2}} + \sqrt{\frac{\log d_2}{d_1}} \right).$$

504 Further, as  $\min_{i,j} h_{ij} = \min_{i,j} \exp(-u_i - v_j) \geq e^{-\tau}$ , then with probability approaching one, for  
 505 every  $(i, j) \in [d_1] \times [d_2]$ , one has  $\hat{h}_{i,j} \geq h_{i,j} - |h_{i,j} - \hat{h}_{i,j}| \geq e^{-\tau}/2 =: h_0$ . By the upper bound (14),  
 506 we have

$$\Delta \lesssim \sqrt{\frac{\log d_1}{d_2}} + \sqrt{\frac{\log d_2}{d_1}} \asymp \sqrt{\frac{\log \max\{d_1, d_2\}}{\min\{d_1, d_2\}}}.$$

507 Further, as  $\Delta \leq 1$ , we have  $\mathbb{E}[\Delta] \lesssim \sqrt{\frac{\log \max\{d_1, d_2\}}{\min\{d_1, d_2\}}}$ .

#### 508 A.3.2 Proof of Example 3.3.2

509 Define the link function  $\psi(t) = q(1 + e^{-\phi(t)})$ , where  $\phi$  is monotonic. Applying Theorem 1 in the  
 510 paper (Davenport et al., 2014), we obtain that with probability at least  $1 - C_1/(d_1 + d_2)$

$$\frac{1}{d_1 d_2} \|\hat{\mathbf{A}} - \mathbf{A}\|_{\text{F}}^2 \leq \sqrt{2} \tilde{C}_{\tau} \sqrt{\frac{k(d_1 + d_2)}{d_1 d_2}}, \quad (15)$$

511 with the proviso that  $d_1 d_2 \geq (d_1 + d_2) \log(d_1 d_2)$ . Here  $\tilde{C}_{\tau} = 2^{39/4} e^{9/4} (1 + \sqrt{6}) \tau L_{\tau} \beta_{\tau}$  with

$$L_{\tau} = \sup_{-\tau \leq t \leq \tau} \frac{|\psi'(t)|}{\psi(t)(1 - \psi(t))}, \quad \text{and} \quad \beta_{\tau} = \sup_{-\tau \leq t \leq \tau} \frac{\psi(t)(1 - \psi(t))}{|\psi'(t)|^2}. \quad (16)$$

512 Denote this high probability event to be  $\mathcal{E}_0$ . Since  $\|\mathbf{A}\|_1 \leq \sqrt{d_1 d_2} \|\mathbf{A}\|_{\text{F}}$ , on this event  $\mathcal{E}_0$ , we further  
 513 have

$$\frac{1}{d_1 d_2} \|\hat{\mathbf{A}} - \mathbf{A}\|_1 \leq C_{\tau} \left( \frac{k(d_1 + d_2)}{d_1 d_2} \right)^{1/4},$$

514 where  $C_\tau = \zeta \sqrt{L_\tau \beta_\tau}$  and  $\zeta$  is a universal constant.

515 Recall that  $h_{ij} = \exp(-\phi(A_{ij}))$  and  $\|\mathbf{A}\|_\infty \leq \tau$ . On the same event  $\mathcal{E}_0$ , we further have

$$\frac{1}{d_1 d_2} \|\hat{\mathbf{H}} - \mathbf{H}\|_1 \leq C'_\tau \left( \frac{k(d_1 + d_2)}{d_1 d_2} \right)^{1/4}, \quad (17)$$

516 where  $C'_\tau = 2e^{\phi(\tau)} \sqrt{\tilde{C}_\tau}$ .

517 By the feasibility of the minimizer  $\hat{\mathbf{A}}$  and the fact that  $\hat{h}_{ij} = \exp(-\phi(\hat{A}_{ij}))$ , we have  $\hat{h}_{ij} \geq h_0 =$   
 518  $e^{-\phi(\tau)}$  for all  $(i, j)$ . This together with the upper bound (14) implies that

$$\Delta \leq \frac{1}{h_0 n_{\text{cal}}} \sum_{(i,j) \in \mathcal{S}_{\text{cal}} \cup \{(i_*, j_*)\}} |h_{ij} - \hat{h}_{ij}| \leq \frac{1}{h_0 n_{\text{cal}}} \|\hat{\mathbf{H}} - \mathbf{H}\|_1.$$

519 Define a second high probability event  $\mathcal{E}_1 = \{n_{\text{cal}} \geq (1-c)(1-q)\|\mathbf{P}\|_1\}$ . Using the Chernoff  
 520 bound, we have  $\mathbb{P}(\mathcal{E}_1) \geq 1 - C_0(d_1 d_2)^{-5}$ . Therefore, on the event  $\mathcal{E}_0 \cap \mathcal{E}_1$ , we have

$$\Delta \leq \frac{d_1 d_2}{c h_0 (1-q) \|\mathbf{P}\|_1} C'_\tau \left( \frac{k(d_1 + d_2)}{d_1 d_2} \right)^{1/4}.$$

521 Under the assumptions that  $p_{ij} = 1/(1 + e^{-\phi(A_{ij})})$ , and that  $\|\mathbf{A}\|_\infty \leq \tau$ , we know that  $p_{ij} \geq C_2$   
 522 for some constant that only depends on  $\tau$ . As a result, we have  $\|\mathbf{P}\|_1 \geq C_2 d_1 d_2$ , which further leads  
 523 to the conclusion that

$$\Delta \leq \frac{1}{c C_2 h_0 (1-q)} C'_\tau \left( \frac{k(d_1 + d_2)}{d_1 d_2} \right)^{1/4}.$$

524 on the event  $\mathcal{E}_0 \cap \mathcal{E}_1$ . In addition, on the small probability event  $(\mathcal{E}_0 \cap \mathcal{E}_1)^c$ , one trivially has  $\Delta \leq 1$ .  
 525 Therefore simple combinations of the cases yields the desired bound on  $\mathbb{E}[\Delta]$ .

### 526 A.3.3 Proof of Lemma A.1

527 Reusing the definition of  $w'$  (13), one has

$$\begin{aligned} \Delta &= \frac{1}{2} \sum_{(i,j) \in \mathcal{S}_{\text{cal}} \cup \{(i_*, j_*)\}} |w_{ij} - w'_{ij}| \\ &= \frac{1}{2} \sum_{(i,j) \in \mathcal{S}_{\text{cal}} \cup \{(i_*, j_*)\}} \frac{|h_{ij} \sum_{(i',j') \in \mathcal{S}_{\text{cal}} \cup \{(i_*, j_*)\}} \hat{h}_{i'j'} - \hat{h}_{ij} \sum_{(i',j') \in \mathcal{S}_{\text{cal}} \cup \{(i_*, j_*)\}} h_{i'j'}|}{\left( \sum_{(i',j') \in \mathcal{S}_{\text{cal}} \cup \{(i_*, j_*)\}} \hat{h}_{i'j'} \right) \left( \sum_{(i',j') \in \mathcal{S}_{\text{cal}} \cup \{(i_*, j_*)\}} h_{i'j'} \right)} \\ &\leq \frac{1}{2} \sum_{(i,j) \in \mathcal{S}_{\text{cal}} \cup \{(i_*, j_*)\}} \left\{ \frac{|h_{ij} \sum_{(i',j') \in \mathcal{S}_{\text{cal}} \cup \{(i_*, j_*)\}} \hat{h}_{i'j'} - \sum_{(i',j') \in \mathcal{S}_{\text{cal}} \cup \{(i_*, j_*)\}} h_{i'j'}|}{\left( \sum_{(i',j') \in \mathcal{S}_{\text{cal}} \cup \{(i_*, j_*)\}} \hat{h}_{i'j'} \right) \left( \sum_{(i',j') \in \mathcal{S}_{\text{cal}} \cup \{(i_*, j_*)\}} h_{i'j'} \right)} \right. \\ &\quad \left. + \frac{|\hat{h}_{ij} - h_{ij}| \sum_{(i',j') \in \mathcal{S}_{\text{cal}} \cup \{(i_*, j_*)\}} h_{i'j'}}{\left( \sum_{(i',j') \in \mathcal{S}_{\text{cal}} \cup \{(i_*, j_*)\}} \hat{h}_{i'j'} \right) \left( \sum_{(i',j') \in \mathcal{S}_{\text{cal}} \cup \{(i_*, j_*)\}} h_{i'j'} \right)} \right\} \\ &= \frac{1}{2} \frac{\left| \sum_{(i',j') \in \mathcal{S}_{\text{cal}} \cup \{(i_*, j_*)\}} \hat{h}_{i'j'} - \sum_{(i',j') \in \mathcal{S}_{\text{cal}} \cup \{(i_*, j_*)\}} h_{i'j'} \right|}{\left( \sum_{(i',j') \in \mathcal{S}_{\text{cal}} \cup \{(i_*, j_*)\}} \hat{h}_{i'j'} \right)} + \frac{1}{2} \frac{\sum_{(i,j) \in \mathcal{S}_{\text{cal}} \cup \{(i_*, j_*)\}} |\hat{h}_{ij} - h_{ij}|}{\left( \sum_{(i',j') \in \mathcal{S}_{\text{cal}} \cup \{(i_*, j_*)\}} \hat{h}_{i'j'} \right)} \\ &\leq \frac{\sum_{(i,j) \in \mathcal{S}_{\text{cal}} \cup \{(i_*, j_*)\}} |\hat{h}_{ij} - h_{ij}|}{\sum_{(i',j') \in \mathcal{S}_{\text{cal}} \cup \{(i_*, j_*)\}} \hat{h}_{i'j'}}. \end{aligned} \quad (18)$$

528 This completes the proof.

## 529 B Additional numerical experiments

530 In this section, we provide additional simulation results. In Section B.1 the confidence intervals  
 531 are visualized. We also present the simulation results for the convex relaxation (cvx) and the  
 532 conformational convex method (cmc-cvx) in both settings with homogeneous and heterogeneous  
 533 missingness in Section B.2 and B.4.

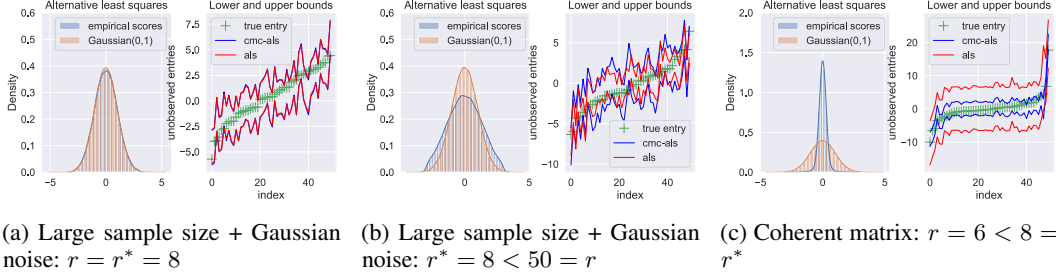

Figure 4: Histogram of standardized scores for aIs and prediction lower and upper bounds for 50 distinct unobserved entries.

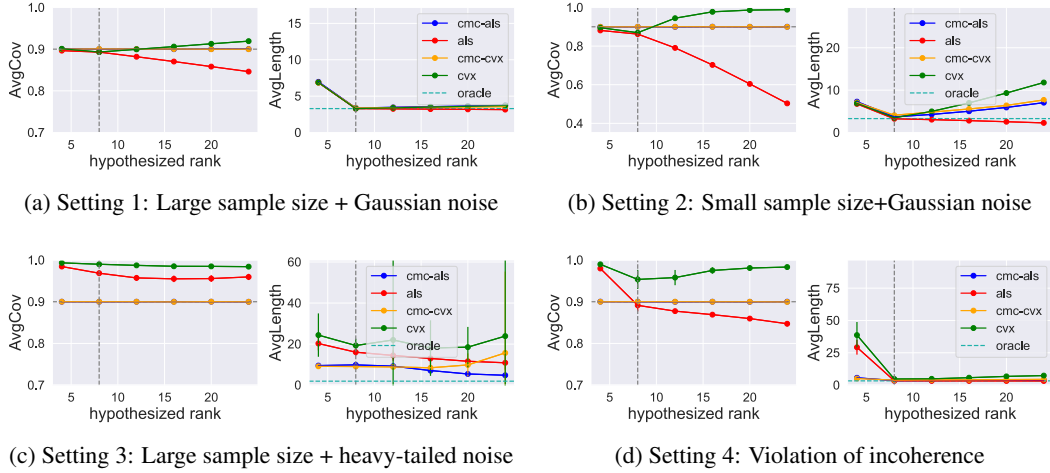

Figure 5: Comparison between conformalized and model-based matrix completion approaches.

## 534 B.1 Illustration of confidence intervals and normalized scores

535 In Figure 4, we present the histogram of standardized scores  $(\widehat{M}_{ij} - M_{ij})/\sqrt{\widehat{\theta}_{ij}^2 + \widehat{\sigma}^2}$  and the  
536 plot of the upper and lower bounds for three settings. In Figure 4a, when the model assumptions  
537 are met and  $r = r^*$ , the scores match well with the standard Gaussian and the prediction bounds  
538 produced by aIs and cmc-aIs are similar. With the same data generating process, when the rank is  
539 overparametrized, the distribution of scores cannot be captured by the standard Gaussian, thus the  
540 quantiles are misspecified. As we can see from the confidence intervals, aIs tends to have smaller  
541 intervals which lead to the undercoverage. In the last setting, the underlying matrix is no longer  
542 incoherent. When the rank is underestimated, the  $r^* - r$  factors will be captured by the noise term  
543 and the high heterogeneity in the entries will further lead to overestimated noise level. As a result,  
544 the intervals by aIs are much larger while the conformalized intervals are more adaptive to the  
545 magnitude of entries.

## 546 B.2 Additional results for homogeneous missingness

547 In this section, we present the results for synthetic simulation with the convex relaxation cvx and  
548 the conformalized convex matrix completion method cmc-cvx. Setting 1, 2, 3, 4 are the same as  
549 introduced in Section 4.1. The true rank is  $r^* = 8$  and the hypothesized rank varies from 4 to 24 with  
550 the stepsize 4.

551 The conformalized methods, regardless of the based algorithm adopted, have nearly exact coverage  
552 around  $1 - \alpha$ . But we can observe different behaviors between aIs and cvx since the convex  
553 relaxation is free of the choice of  $r$  until the projection of  $\widehat{\mathbf{M}}_{\text{cvx}}$  onto the rank- $r$  subspace (Chen et al.  
554 2020). As a result, when  $r > r^*$ , cvx tends to overestimate the strength of the noise. In Figure 5a, 5b  
555 and 5d, when  $r > r^*$ , cvx has coverage rate higher than the target level and the confidence interval

is more conservative than conformalized methods. Since the accuracy of  $\text{cvx}$  is based on the large sample size, in Figure 5b, when the effective sample size is insufficient with small  $p_{ij}$ , the residuals from  $\text{cvx}$  have a large deviation from the standard distribution and the intervals are much larger than the oracle ones. Besides, in Figure 5c when the noise has heavy tails than Gaussian variables,  $\text{cvx}$  overestimates the noise strength similar to  $\text{a1s}$  and is conservative in coverage. When the incoherence condition is violated in Figure 5d, if  $r < r^*$ , both  $\text{cvx}$  and  $\text{a1s}$  fit the missed factor by overestimating the noise strength and produce extremely large intervals.

### B.3 Estimation error for one-bit matrix estimation

The estimation error in  $\hat{p}_{ij}$  can be visualized from the following heatmaps comparing  $\mathbf{P}$  and  $\hat{\mathbf{P}}$ . Here the entries are sorted by the order of  $p_{ij}$  for each row and each column.

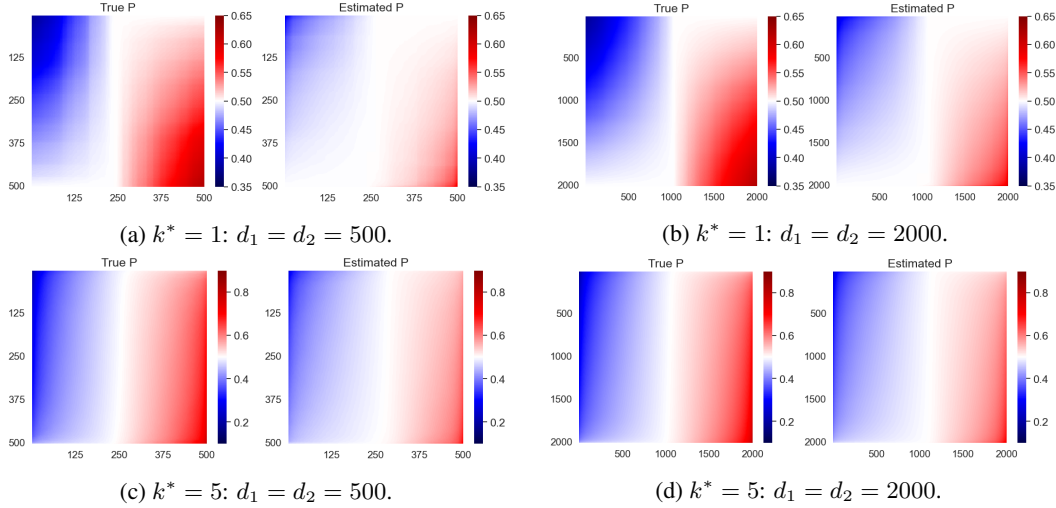

Figure 6: Heatmaps for  $\mathbf{P}$  and  $\hat{\mathbf{P}}$ .

### B.4 Additional results for heterogeneous missingness

In Figure 7, we present the results for synthetic simulation with the convex relaxation  $\text{cvx}$  as the base algorithm, where we denote  $\text{cmc-cvx}$  and  $\text{cmc}^*-\text{cvx}$  as the conformalized matrix completion method with estimated weights and true weights, respectively. Three settings with heterogeneous missingness are the same as Figure 2

### B.5 Additional plots for the sales dataset

Denote  $\mathbf{M}$  the underlying matrix in the sales dataset. In Figure 8a, we plot singular values of  $\mathbf{M}$  and top-5 singular values contain a large proportion of the information. In Figure 8b, we plot the histogram of entries  $M_{ij}$ 's of the underlying matrix, and the sales dataset has the range from 0 to over 20 thousand with a heavy tail.

In Figure 9,  $\text{cmc-cvx}$  has nearly exact coverage at  $1 - \alpha$ , but  $\text{cvx}$  tends to have higher coverage than the target level. Besides, the convex approach has much larger intervals when  $r$  is large, which can be caused by the overfitting of the observed entries. As conformalized approach leaves out a proportion of observed entries as the training set, intervals produced by  $\text{cmc-cvx}$  are less accurate than  $\text{cvx}$  due to the poorly behaved base algorithm.

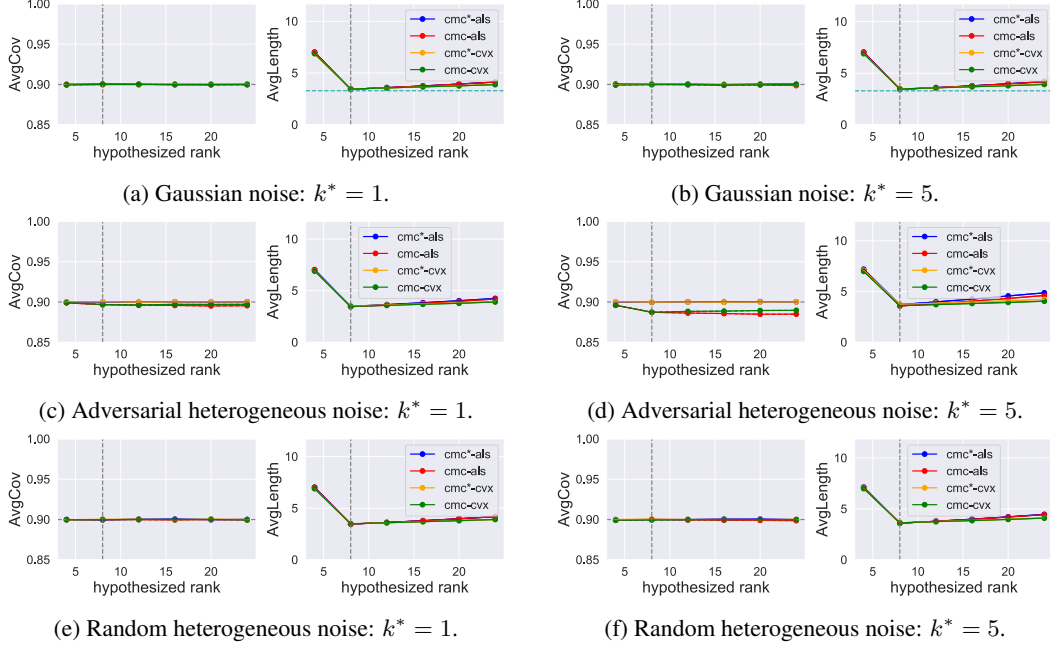

Figure 7: Comparison under heterogeneous missingness.

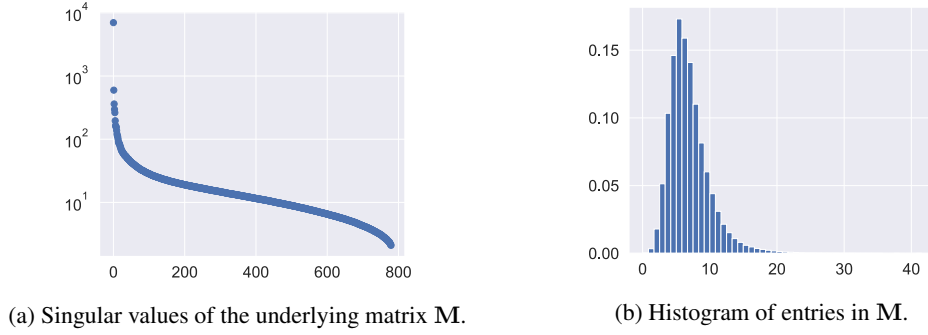

Figure 8: Descriptive plots for the underlying matrix  $\mathbf{M}$ .

## C Additional details of algorithms and extensions

### C.1 Extension to likelihood-based scores and categorical matrices

We will show in this section that cmc can also be applied to categorical matrix completion (Cao and Xie, 2015) or a more general setting in (19), the validity of which is also guaranteed by the presented theorem.

**Setup** To formulate the problem, consider an underlying parameter matrix  $\mathbf{M}^* \in [d_1] \times [d_2]$  and the observations  $\{M_{ij} : i \in [d_1], j \in [d_2]\}$  are drawn from the distribution

$$M_{ij} \mid M_{ij}^* \sim \mathcal{P}_{M_{ij}^*}, \quad (19)$$

where  $\{\mathcal{P}_\theta\}_{\theta \in \Theta}$  can be a family of parametric distributions with probability density  $p_\theta$ . The categorical matrix completion is a specific example where the support of  $M_{ij}$  is finite or countable. For example, a Poisson matrix is generated by  $M_{ij} \sim \text{Pois}(M_{ij}^*)$ , where  $M_{ij}^*$  is the Poisson mean. Similar to the previous setup, we treat  $\mathbf{M}$  as deterministic, and entries in the subset  $\mathcal{S} \subseteq [d_1] \times [d_2]$  are available. Here  $\mathcal{S}$  is sampled in the same manner as before with the matrix  $\mathbf{P} \in [d_1] \times [d_2]$ .



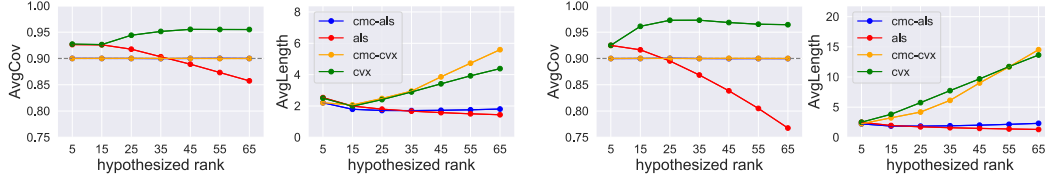

(a) Homogeneous missingness.

(b) Heterogeneous missingness with  $k^* = 1$ .

Figure 9: Comparison between conformalized and model-based matrix completion with sales dataset.

**Split conformal approach** Consider the split approach with the partition  $\mathcal{S} = \mathcal{S}_{\text{tr}} \cup \mathcal{S}_{\text{cal}}$  as in Algorithm 1. With the training set  $\mathbf{M}_{\text{tr}}$ , we obtain an estimated likelihood function  $\hat{\pi}(m; i, j)$  such that

$$\hat{\pi}(m; i, j) = \hat{p}_{M_{ij}^*}(m),$$

which is an estimate for the true likelihood of  $M_{ij}$  at  $m$ . The estimation can be feasible given certain low-complexity structures. For example, if a hypothesized distribution family  $\{Q_\theta\}_{\theta \in \Theta}$  with probability density  $q_\theta$  is given and the underlying mean matrix  $\mathbf{M}^*$  is assumed to be low-rank. Then,  $\mathbf{M}$  can be viewed as a perturbation of  $\mathbf{M}^*$  and we can estimate  $\mathbf{M}^*$  via matrix completion algorithms with entries in  $\mathbf{M}_{\text{tr}}$ . Denote  $\hat{\mathbf{M}}$  as the estimate for  $\mathbf{M}^*$ , then we have the estimated likelihood

$$\hat{\pi}(m; i, j) = q_{\hat{M}_{ij}}(m).$$

The odds ratios are also estimated from the training set, i.e.  $\hat{h}_{ij}$ , from which we compute the weights

$$\hat{w}_{ij} = \frac{\hat{h}_{ij}}{\sum_{(i', j') \in \mathcal{S}_{\text{cal}}} \hat{h}_{i'j'} + \max_{(i', j') \in \mathcal{S}^c} \hat{h}_{i'j'}}, \quad (i, j) \in \mathcal{S}_{\text{cal}}, \quad \hat{w}_{\text{test}} = \frac{\hat{h}_{i_*j_*}}{\sum_{(i', j') \in \mathcal{S}_{\text{cal}}} \hat{h}_{i'j'} + \max_{(i', j') \in \mathcal{S}^c} \hat{h}_{i'j'}}.$$

For each  $(i, j) \in \mathcal{S}_{\text{cal}}$ , calculate the likelihood-based nonconformity score

$$R_{ij} = -\hat{\pi}(M_{ij}; i, j).$$

Then, for any test point  $(i_*, j_*) \in \mathcal{S}^c$ , we can construct the confidence interval

$$\hat{C}(i_*, j_*) = \{m \in [K] : \hat{\pi}(m; i_*, j_*) \leq \hat{q}\},$$

where  $\hat{q}$  is the weighted quantile

$$\hat{q} = \text{Quantile}_{1-\alpha} \left( \sum_{(i, j) \in \mathcal{S}_{\text{cal}}} \hat{w}_{ij} \cdot \delta_{R_{ij}} + \hat{w}_{\text{test}} \cdot \delta_{+\infty} \right).$$

More examples of conformal methods for classification are shown in Romano et al. (2020), Angelopoulos et al. (2020), etc.

## C.2 Full conformalized matrix completion

In Algorithm 2 the procedure of the full conformalized matrix completion (full-cmc) is presented. This full conformal version of cmc offers the same coverage guarantee as given in Theorem 3.2 for the split version of cmc (except with the entire observed set  $\mathcal{S}$  in place of  $\mathcal{S}_{\text{cal}}$ , when defining  $\Delta(\hat{\mathbf{w}})$ ; the formal proof of this bound for full conformal is very similar to the proof of Theorem 3.2 using an analogous weighted exchangeability argument as in Lemma 3.1, and so we omit it here.

To define this algorithm, we need some notation: given the observed data  $\mathbf{M}_{\mathcal{S}}$ , plus a test point location  $(i_*, j_*)$  and a hypothesized value  $m$  for the test point  $M_{i_*j_*}$ , define a matrix  $\mathbf{M}^{(m)}$  with entries

$$M_{ij}^{(m)} = \begin{cases} M_{ij}, & (i, j) \in \mathcal{S}, \\ m, & (i, j) = (i_*, j_*), \\ \emptyset, & \text{otherwise,} \end{cases} \quad (20)$$

---

**Algorithm 2** full-cmc: full conformalized matrix completion
 

---

- 1: **Input:** target level  $1 - \alpha$ ; partially observed matrix  $\mathbf{M}_S$ .
- 2: Using the training data  $\mathbf{M}_S$ , compute an estimate  $\hat{\mathbf{P}}$  of the observation probabilities (with  $\hat{p}_{ij}$  estimating  $p_{ij}$ , the probability of entry  $(i, j)$  being observed).
- 3: **for**  $(i_*, j_*)$  in  $\mathcal{S}^c$  **do**
- 4:   **for**  $m \in \mathcal{M}$  **do**
- 5:     Augment  $\mathbf{M}_S$  with one additional hypothesized entry,  $\{M_{i_*, j_*} = m\}$ , to obtain  $\mathbf{M}^{(m)}$  defined as in (20).
- 6:     Using the imputed matrix  $\mathbf{M}_S^{(m)}$ , compute:
  - An initial estimate  $\widehat{\mathbf{M}}^{(m)}$  using any matrix completion algorithm (with  $\widehat{M}_{ij}^{(m)}$  estimating the target  $M_{ij}$ );
  - Optionally, a local uncertainty estimate  $\widehat{\mathbf{s}}^{(m)}$  (with  $\widehat{s}_{ij}^{(m)}$  estimating our relative uncertainty in the estimate  $\widehat{M}_{ij}^{(m)}$ ), or otherwise set  $\widehat{s}_{ij}^{(m)} \equiv 1$ ;
  - An estimate  $\widehat{\mathbf{P}}$  of the observation probabilities (with  $\widehat{p}_{ij}$  estimating  $p_{ij}$ , the probability of entry  $(i, j)$  being observed).
- 7:     Compute normalized residuals for  $(i, j) \in \mathcal{S} \cup \{(i_*, j_*)\}$ ,

$$R_{ij}^{(m)} = \frac{|M_{ij} - \widehat{M}_{ij}^{(m)}|}{\widehat{s}_{ij}^{(m)}}.$$

- 8:     Compute weights

$$\widehat{w}_{ij} = \frac{\widehat{h}_{ij}}{\sum_{(i', j') \in \mathcal{S} \cup \{(i_*, j_*)\}} \widehat{h}_{i' j'}}, \quad \widehat{h}_{ij} = \frac{1 - \widehat{p}_{ij}}{\widehat{p}_{ij}}, \quad (i, j) \in \mathcal{S} \cup \{(i_*, j_*)\}.$$

- 9:     Compute the weighted quantile

$$\widehat{q}^{(m)}(i_*, j_*) = \text{Quantile}_{1-\alpha} \left( \sum_{(i, j) \in \mathcal{S}} \widehat{w}_{ij} \delta_{R_{ij}^{(m)}} + \widehat{w}_{i_* j_*} \delta_{+\infty} \right) \quad (21)$$

- 10:   **end for**

- 11: **end for**

- 12: **Output:**  $\{\widehat{C}(i_*, j_*) = \{m \in \mathcal{M} : R_{i_* j_*}^{(m)} \leq \widehat{q}^{(m)}(i_*, j_*)\} : (i_*, j_*) \in \mathcal{S}^c\}$
- 

616 where, abusing notation, “ $M_{ij} = \emptyset$ ” denotes that no information is observed in this entry.

617 We note that, when  $\mathcal{M} = \mathbb{R}$  (or an infinite subset of  $\mathbb{R}$ ), the computation of the prediction set  
 618 is impossible in most of the cases. In that case, our algorithm can be modified via a trimmed or  
 619 discretized approximation; these extensions are presented for the regression setting in the work of  
 620 [Chen et al. \(2016, 2018\)](#), and can be extended to the matrix completion setting in a straightforward  
 621 way.

### 622 C.3 Exact split conformalized matrix completion

623 In Algorithm [3](#), we present the exact split approach, which is less conservative than our one-shot  
 624 approach given in Algorithm [1](#), but may be less computationally efficient. In this version of the  
 625 algorithm, the quantile  $\widehat{q} = \widehat{q}(i_*, j_*)$  needs to be computed for each missing entry since the weight  
 626 vector  $\widehat{\mathbf{w}}$  depends on the value of  $\widehat{p}_{i_*, j_*}$ .

---

**Algorithm 3** split-cmc: split conformalized matrix completion
 

---

- 1: **Input:** target coverage level  $1 - \alpha$ ; data splitting proportion  $q \in (0, 1)$ ; observed entries  $\mathbf{M}_{\mathcal{S}}$ .  
 2: Split the data: draw  $W_{ij} \stackrel{\text{i.i.d.}}{\sim} \text{Bern}(q)$ , and define training and calibration sets,

$$\mathcal{S}_{\text{tr}} = \{(i, j) \in \mathcal{S} : W_{ij} = 1\}, \quad \mathcal{S}_{\text{cal}} = \{(i, j) \in \mathcal{S} : W_{ij} = 0\}.$$

- 3: Using the training data  $\mathbf{M}_{\mathcal{S}_{\text{tr}}}$  indexed by  $\mathcal{S}_{\text{tr}} \subseteq [d_1] \times [d_2]$ , compute:
- An initial estimate  $\widehat{\mathbf{M}}$  using any matrix completion algorithm (with  $\widehat{M}_{ij}$  estimating the target  $M_{ij}$ );
  - Optionally, a local uncertainty estimate  $\widehat{s}$  (with  $\widehat{s}_{ij}$  estimating our relative uncertainty in the estimate  $\widehat{M}_{ij}$ ), or otherwise set  $\widehat{s}_{ij} \equiv 1$ ;
  - An estimate  $\widehat{\mathbf{P}}$  of the observation probabilities (with  $\widehat{p}_{ij}$  estimating  $p_{ij}$ , the probability of entry  $(i, j)$  being observed).
- 4: Compute normalized residuals on the calibration set,

$$R_{ij} = \frac{|M_{ij} - \widehat{M}_{ij}|}{\widehat{s}_{ij}}, \quad (i, j) \in \mathcal{S}_{\text{cal}}.$$

- 5: Compute estimated odds ratios for the calibration set and test set,

$$\widehat{h}_{ij} = \frac{\widehat{p}_{ij}}{1 - \widehat{p}_{ij}}, \quad (i, j) \in \mathcal{S}_{\text{cal}} \cup \mathcal{S}^c,$$

- 6: **for**  $(i_*, j_*) \in \mathcal{S}^c$  **do**

- 7:   Compute weights for the calibration set and test point,

$$\widehat{w}_{ij} = \frac{\widehat{h}_{ij}}{\sum_{(i', j') \in \mathcal{S}_{\text{cal}}} \widehat{h}_{i'j'} + \widehat{h}_{i_*j_*}}, \quad (i, j) \in \mathcal{S}_{\text{cal}}, \quad \widehat{w}_{\text{test}} = \frac{\widehat{h}_{i_*j_*}}{\sum_{(i', j') \in \mathcal{S}_{\text{cal}}} \widehat{h}_{i'j'} + \widehat{h}_{i_*j_*}}.$$

- 8:   Compute threshold

$$\widehat{q}(i_*, j_*) = \text{Quantile}_{1-\alpha} \left( \sum_{(i, j) \in \mathcal{S}_{\text{cal}}} \widehat{w}_{ij} \cdot \delta_{R_{ij}} + \widehat{w}_{\text{test}} \cdot \delta_{+\infty} \right),$$

where  $\delta_t$  denotes the point mass at  $t$ .

- 9: **end for**

- 10: **Output:** confidence intervals

$$\widehat{C}(i_*, j_*) = \widehat{M}_{i_*j_*} \pm \widehat{q}(i_*, j_*) \cdot \widehat{s}_{i_*j_*}$$

for each unobserved entry  $(i_*, j_*) \in \mathcal{S}^c$ .

---
